1 Linked-read museomics

2

3 **Higher quality *de novo* genome assemblies from degraded museum specimens: a**  
4 **linked-read approach to museomics**

5

6 Jocelyn P. Colella, Anna Tigano, Matthew D. MacManes

7

8 Molecular, Cellular, and Biomedical Sciences Department, University of New

9 Hampshire, Durham, NH 03857; [jocelyn.colella@unh.edu](mailto:jocelyn.colella@unh.edu) (JPC), [anna.tigano@unh.edu](mailto:anna.tigano@unh.edu)

10 (AT), [matthew.macmanes@unh.edu](mailto:matthew.macmanes@unh.edu) (MDM)

11

12 \* Corresponding author: [Jocelyn.Colella@unh.edu](mailto:Jocelyn.Colella@unh.edu)

13

14 Key words: 10X Genomics, assembly quality, natural history collections, *Peromyscus*

15

16

17

18

19

20

21

22

23

24  
25  
26  
27  
28  
29  
30  
31  
32  
33  
34  
35  
36  
37  
38  
39  
40  
41  
42  
43  
44  
45  
46

## ABSTRACT

High-throughput sequencing technologies are a proposed solution for accessing the molecular data in historic specimens. However, degraded DNA combined with the computational demands of short-read assemblies has posed significant laboratory and bioinformatics challenges. Linked-read or ‘synthetic long-read’ sequencing technologies, such as 10X Genomics, may provide a cost-effective alternative solution to assemble higher quality *de novo* genomes from degraded specimens. Here, we compare assembly quality (e.g., genome contiguity and completeness, presence of orthogroups) between four published genomes assembled from a single shotgun library and four deer mouse (*Peromyscus* spp.) genomes assembled using 10X Genomics technology. At a similar price-point, these approaches produce vastly different assemblies, with linked-read assemblies having overall higher quality, measured by larger N50 values and greater gene content. Although not without caveats, our results suggest that linked-read sequencing technologies may represent a viable option to build *de novo* genomes from historic museum specimens, which may prove particularly valuable for extinct, rare, or difficult to collect taxa.

47

## INTRODUCTION

48 A disconnect between the capabilities of high-throughput sequencing technologies and  
49 the quality, or lack thereof, of historic museum specimens has largely neutered the  
50 ability of genomic methods to access molecular data from degraded specimens. Natural  
51 history collections (NHCs) store a wide variety of species from across the globe,  
52 including those that are difficult to collect or extinct in the wild. Voucher specimens  
53 housed in NHCs have been an invaluable source of morphological material as they  
54 provide a reference for measuring change across both space and time. More recently,  
55 specimens contained in NHCs have been recognized as important repositories of  
56 genetic data (Payne & Sorenson, 2002; Wandeler, Hoeck & Keller, 2007) and have  
57 provided insight into the phylogenetic relationships and origins of species (Suarez &  
58 Tsutsui, 2004; McLean et al., 2015). Quick progress in genomics methods are now  
59 enabling the use of museum specimens in ways that were not imaginable until only a  
60 few years ago. “Museomics”, or the application of genomic techniques to museum  
61 specimens, has already uncovered reticulate evolutionary histories across hominids  
62 (Green et al. 2010; Meyer et al., 2012, 2014) and is increasingly resolving the  
63 phylogenetic Tree of Life (Teeling & Hedges, 2013; Lessa, Cook, D’Elia, & Opazo,  
64 2014; Wood, González, Lloyd Coddington, & Scharff, 2018), with expanded applications  
65 including, but not limited to, identifying functional variants implicated in ecological  
66 adaptations (Opazo, Palma, Melo, & Lessa., 2005) and estimating mutation rates and  
67 the timing of evolutionary events (Pélissié, Crossley, Cohen, & Schoville, 2018).

68 Over time, however, and through exposure to agents known to degrade nucleic  
69 acids (UV, temperature, pH, salt, chemical modification, etc.; Dessauer, Cole, & Hafner,

70 1990; Lindahl, 1993; Dean & Ballard, 2001; Willerslev & Cooper, 2005), DNA degrades  
71 into short fragments, which can complicate the application of genomic methods to  
72 museum specimens. Since the 1970s, when museums widely began archiving tissues,  
73 collection and preservation methods have varied widely, but generally evolved to  
74 accommodate changing analytical technologies, resulting in the variety of preservation  
75 methods (e.g., formalin, ethanol, ground, frozen, etc.) and quality of tissue collections  
76 available to researchers today. In addition to the challenges of tissue preservation, field  
77 conditions including weather, processing speed, and available cold storage options are  
78 inherently unpredictable, resulting in further inconsistencies in field-collected tissue  
79 quality.

80 *De novo* genome assembly is the computational process of optimally fitting short-  
81 read fragments output from sequencers into a larger contiguous whole-genome  
82 sequence, recovering critical information about the locations of genes and variants that  
83 are lost in the sequencing process. Assembly methods are based on the often-incorrect  
84 assumption that similar DNA fragments originate from the same position within the  
85 genome; therefore, assembly can be complicated by the presence of extended repeats  
86 or regions of high divergence that extend beyond the sequenced read length (Alkan,  
87 Sajjadian, & Eichler, 2011; Nagarajan & Pop, 2013). Unfortunately, methods that yield  
88 the highest quality *de novo* genome assemblies often require large quantities of high  
89 molecular weight (HMW) DNA as starting material for library preparation, as the ability  
90 to resolve sequencing artefacts in assembly improves with increasing read length. This  
91 prerequisite often makes these methods inaccessible to degraded specimens. For  
92 example, although the recent emergence of long-read sequencing technologies (>10-50

93 kb) has significantly improved the computational complexities of *de novo* genome  
94 assembly, long-read sequencing requires large quantities of HMW DNA as a starting  
95 material, making these methods impractical for most museum samples (Rowe et al.,  
96 2011). Prior to the development of long-read sequencing, the most common approach  
97 to *de novo* genome assembly has involved a combination of shotgun short-insert (<500  
98 bp) and mate-pair long-insert (>2000 bp) libraries of varying insert size, where the first  
99 would be used for assembly and the second for scaffolding. Once again, scaffolding  
100 would be limited by fragmented DNA, as input molecules must be longer than the  
101 selected insert size. More recently, the protocol accompanying the assembler  
102 DISCOVAR denovo (Broad Institute, 2015; Weisenfeld, Kumar, Shah, Church, & Jaffe,  
103 2017), which is based on single short-insert shotgun libraries sequenced to ~60X using  
104 250 bp paired-end reads, appears to be a viable option for genome assembly from  
105 degraded samples. This approach proved cost-effective for the genome assembly of 20  
106 *Heliconius* species (Edelman et al., 2018), but for organisms with larger genomes this  
107 option is significantly more expensive than other approaches due to the high coverage  
108 and longer read lengths required. An appealing alternative is reference-guided  
109 assembly (Rowe et al., 2011; Staats et al., 2013), where either raw reads are mapped  
110 to an existing high-quality reference genome from a closely related species to build a  
111 consensus sequence (Pop, 2009) or a related reference genome is used only as a  
112 scaffolding guide (Gnerre, Lander, Lindblad-Toh, & Jaffe, 2009). While this approach  
113 may offer a partial solution, high quality, closely related references, a prerequisite for  
114 this approach, are not available for a large number of ecologically relevant taxa yet. To  
115 overcome this obstacle, other studies have recommended avoiding whole-genome

116 sequencing (WGS) of museum specimens altogether, suggesting exome capture (Bi et  
117 al., 2013) or other reduced-representation approaches (Jones & Good, 2018) as an  
118 alternative proxy for accessing molecular data from museum specimens. However, in  
119 addition to complex laboratory work, these approaches retrieve only a restricted subset  
120 of sequence data relative to WGS. In addition to the potentially confounding effect of  
121 pervasive purifying selection on exonic coding regions (Jackson, Campos, & Zeng,  
122 2014), exome sequencing further fails to represent significant regulatory or non-coding  
123 regions essential to phylogenetic reconstruction (Nei & Tateno, 1975; Lynch, 1989),  
124 and, with increasing awareness, for understanding the targets of adaptive evolution  
125 (Andolfatto, 2005; Brooks, Turkarslan, Beer, Lo, & Baliga, 2011).

126         In the grey area between second and third generation sequencing, linked-read or  
127 ‘synthetic long-read’ (SLR, Voskoboynik et al., 2013) sequencing may provide a cost-  
128 effective solution for *de novo* genome sequencing from degraded specimens. These  
129 methods allow the assembly of pseudo-long reads up to 18kb from short-read data with  
130 higher accuracy compared to true long-read sequencing techniques (Jiao &  
131 Schneeberger, 2017). Initially introduced by Illumina (Kuleshov et al., 2014; McCoy et  
132 al., 2014), SLR methods have not been widely adopted by evolutionary biologists and  
133 museum scientists. 10X Genomics (Zheng et al., 2016), a newer technology loosely  
134 based on innovations developed by the Illumina SLR technique, offers several  
135 advantages for museum science applications. Specifically, this method requires as little  
136 as 1 nanogram of input material and it is robust to the effects of input DNA quality. 10X  
137 Genomics uses microfluidics to split extracted DNA fragments across >100,000  
138 partitions or ‘GEM’s (gel-coated beads). Each ‘GEM’ then contains a fraction (< 0.5%) of

139 the genome, which is further sheared and barcoded. Reads from the same partition or  
140 ‘GEM’ are sequenced via conventional Illumina short-read sequencing and assembled  
141 locally, by barcode, as they must be derived from the same original DNA fragment  
142 (Goodwin, McPherson, & McCombie, 2016; van Dijk, Jaszczyszyn, Naquin, & Thermes,  
143 2018). Although HMW DNA is optimal for any method, the physical separation of DNA  
144 fragments in a ‘GEM’ largely eliminates the issue of degraded DNA and increases  
145 assembly confidence by geographically linking small-reads in genome-space, thereby  
146 reducing misassembly. This library preparation method can also facilitate allele phasing  
147 and the detection of structural variants, although its power will depend on the quality of  
148 starting DNA (Lee et al., 2016; Zheng et al., 2016).

149         While linked-reads are currently optimized for human genomes  
150 (kb.10xgenomics.com) and most often applied to cancer and biomedical related  
151 questions (Zheng et al., 2016), these methods are beginning to be explored in other  
152 taxa (orchids, Zhang et al., 2017; sea otters and beluga whales, Jones et al., 2017a, b).  
153 As a consequence of phylogeny, 10X Genomics methods are most easily extended to  
154 other mammalian taxa, expected to have similar genome size and structure (e.g., repeat  
155 content, heterozygosity, etc.). Thus, as a proof-of-concept, we compare assembly  
156 quality and content of four deer mouse (*Peromyscus*) genomes sequenced and  
157 assembled using the 10X Genomics linked-read approach with — at a comparable cost  
158 — four publically-available shotgun Illumina mammalian genome assemblies generated  
159 from comparable read volumes. We demonstrate the utility of this economical approach  
160 to whole genome reconstruction for researchers interested in questions related to  
161 systematics and functional genomics.

162

163

## MATERIALS & METHODS

164 Twenty-five micrograms of frozen liver tissue from each of four field-collected museum

165 specimens (*Peromyscus attwateri* [MSB:Mamm:84733], *Peromyscus aztecus*

166 [MSB:Mamm:48205], *Peromyscus melanophrys* [MSB:Mamm:273915], and

167 *Peromyscus nudipes* [MSB:Mamm:70743]) were loaned from the Museum of

168 Southwestern Biology (MSB). Three of the specimens were collected internationally and

169 collections dates ranged from 1982 to 2006 (Table 1). Genomic DNA was extracted

170 using a standard QIAGEN Genomic Tip (Valencia, CA, USA) protocol. DNA was

171 quantified with Qubit and its quality was assessed using an Agilent TapeStation (Santa

172 Clara, CA, USA). DNA from each of the four species contained a distribution of DNA

173 fragments heavily skewed towards smaller molecular weights. As fragment size

174 distribution greatly influences the contiguity of the genome assembly, we further

175 processed the samples using the Circulomics short read eliminator kit (Baltimore, MD,

176 USA), which removes DNA molecules shorter than 10kb, and progressively up to 25 kb,

177 thereby removing the vast majority of our DNA sample. The remaining DNA from each

178 of these samples was sent to the Genomics Core Facility at Icahn School of Medicine at

179 Mount Sinai for library preparation, where samples were run on a Femto Pulse (Agilent,

180 Santa Clara, CA, USA) to assess fragment size distribution post-Circulomics

181 (Supplemental Information). Resulting 10X libraries were sequenced at Novogene

182 (Novogene, Sacramento, CA, USA) using 150 bp paired reads generated in one lane of

183 Illumina HiSeq X for each species. Raw data were assembled with SUPERNOVA v. 2.1.1

184 (Weisenfeld *et al.* 2017) and the final fasta file was generated using the 'pseudohap



185 style' option in *supernova mkoutput* using default settings. All commands used for this  
186 work are available at [https://github.com/macmanes-lab/museum\\_genomics](https://github.com/macmanes-lab/museum_genomics).

187 We downloaded four publically available genome assemblies generated from a  
188 single shotgun library sequenced on an Illumina platform. To minimize differences in  
189 genome structure that could affect the performance of different methods, we selected  
190 four mammalian species of similar genome size including *Tympanoctomys barrerae*,  
191 *Octomys mimax* (Evans, Upham, Golding, Ojeda, & Ojeda, 2017), *Phodopus sungorus*  
192 (Bao, Hazelerigg, Prendergast, & Stevenson, 2016), and *Tolypeutes matacus* (Johnson  
193 et al., 2017).

194 To compare 10X versus shotgun-based assemblies, we assessed genome  
195 quality through comparison of relative N50 values, genome completeness using  
196 presence of BUSCO genes and of orthologous groups. Because the mammalian  
197 genomes considered here are generally similar in size, N50 values are comparable and  
198 normalization by genome size is not necessary. Comparative shotgun assemblies were  
199 selected based on the number of total reads sequenced (~200M), as an equivalent  
200 sequencing cost comparison against 10X Genomics. Read counts and assembly details  
201 for each externally sourced genome are available in Table 2.

202 All genomes were annotated using MAKER v. 2.3.1 (Cantarel et al., 2008) using  
203 the *Mus musculus* (GCF\_000001635.26) reference proteome. The N50 statistic was  
204 calculated via the *abyss-fac* tool included in the ABYSS package (Simspon et al., 2009).  
205 Benchmarking Universal Single-Copy Orthologs (BUSCO v. 3; Simão, Waterhouse,  
206 Ioannidis, Kriventseva, & Zdobnov, 2015) statistics were used as metrics of genome

207 completeness based on gene content for genes conserved across Mammalia  
208 (mammalia\_odb9).

209 We grouped genes from each species into orthogroups using ORTHOFINDER v.  
210 2.3.3 (Emms & Kelly, 2015) and determined the number of orthogroups we could  
211 retrieve from each assembly. As proof of concept, a species tree was built for the  
212 *Peromyscus* taxa sequenced here, three publically available *Peromyscus* genomes (*P.*  
213 *maniculatus* [GCA\_003704035], *P. leucopus* [GCF\_004664715], and *P. polionotus*  
214 [GCA\_003704135] ), and four outgroup sequences (*Rattus norvegicus*  
215 [GCA\_000001895.4], *Mus musculus* [GCF\_000001635.26\_GRCm38], *Onychomys*  
216 *torridus* [GCA\_004026725], and *Sigmodon hispidus* [GCA\_004025045] based on the  
217 ORTHOFINDER sets of orthologous genes, using IQTREE and default settings (Nguyen,  
218 Schmidt, von Haeseler, & Minh, 2015).

219

220

## RESULTS

221 Read counts for each analyzed genome are available in Table 2. Additional assembly  
222 statistic (n:500, L50, N80, N50, N20, E-size, etc.) are available online at  
223 [https://github.com/macmanes-lab/museum\\_genomics/blob/master/assembly\\_stats.md](https://github.com/macmanes-lab/museum_genomics/blob/master/assembly_stats.md).

224 N50 values ranged from 2,626 to 39,982 bp with the highest values for 10X  
225 Genomics assemblies (36,160 bp on average) and lowest for single-lane Illumina  
226 assemblies (6,457 bp on average; Table 2). The number of genes annotated ranged  
227 from 3,233 (*P. sungorus*) to 19,008 (*P. attwateri*), with 10X Genomics assemblies  
228 18,068 genes on average, compared to 10,900 genes in the average shotgun-based  
229 assembly. BUSCO measures of genome completeness ranged from 16.9% (*O. mimax*)

230 to 66.4% (*P. attwateri*) and were again highest for 10X Genomics assemblies (average:  
231 61.6%) and lowest for shotgun assemblies (average: 27.3%; Table 2).

232 Annotations and predicted transcripts and proteins are available at  
233 <http://doi.org/10.5281/zenodo.3351485>. ORTHOFINDER identified 5,305 orthologous  
234 groups on average in shotgun-based assemblies and 9,112 on average in 10X  
235 assemblies ( $p < 0.05$ ; Table 2). Our basic maximum-likelihood species tree resolved  
236 relationships with 100% bootstrap support (Fig. 1). Raw reads and assemblies are  
237 available through The European Nucleotide Archive (ENA) under project number  
238 PRJEB33530.

239

240

## DISCUSSION

241 Linked-read sequencing facilitates the production of higher quality *de novo* genomes  
242 from historic samples, in less time, and with less effort than traditional shotgun based  
243 methods, providing a new option for accessing the genomes of aged samples. As such,  
244 linked-read sequencing may be the long-awaited key to unlocking the molecular secrets  
245 of NHCs and have applications across a broad range of evolutionary and ecological  
246 questions. *De novo* assemblies from linked-reads have greater contiguity and  
247 completeness relative to *de novo* assemblies based on shotgun libraries for comparable  
248 read volumes (Table 2). With the same sequencing effort (e.g., 200 million 150 bp  
249 paired-end reads) linked-read sequencing results in a six-fold increase in N50 values  
250 and increases the number of represented genes by three times, without requiring a  
251 reference sequence from a closely related species. Using 10X assemblies as reference  
252 genomes to map population-level whole genome resequencing data, which are only

253 minimally affected by DNA degradation, will also increase the amount of variation, both  
254 sequence and structural, available for genotyping within and among species. Note that,  
255 once a *de novo* reference genome is available, shotgun libraries sequenced with short  
256 reads will still be a viable and cost-effective methodological choice for whole-  
257 genome resequencing. Linked-read methods facilitate the detection of rare alleles and  
258 enable haplotype phasing, both of which may be key to identifying emerging model taxa  
259 for biomedical research, investigations of rare genetic disorders in humans, and  
260 analyses of introgression, by enabling estimates of local ancestry (Tennessen et al.,  
261 2012; Janzen, Wang, & Hufford, 2019). Previously limited by technology, molecular  
262 investigations of museum specimens traditionally centered around systematic inquiry  
263 and phylogenetics. Now, the ability economically generate quality *de novo* assemblies  
264 for lower-quality tissue resources increases the power of these historic archives to  
265 address new questions.

266         Although the quality and completeness of linked-read assemblies are still  
267 dependent on DNA integrity, the application of linked-read methods may be especially  
268 impactful for rare or extinct species or when the collection of new material is difficult or  
269 impossible (Payne & Sorenson, 2002) due to the conservation status or geographic  
270 location (*e.g.*, international) of the target species. As new or higher-quality tissue  
271 samples will never again be available for extinct species, linked-reads offer an improved  
272 method for accessing data from preserved tissues of these species, even if the  
273 generation of perfectly contiguous genomes for these taxa is not attainable. In cases  
274 where the target species is highly divergent from available reference sequences, such  
275 as the case for extinct species or otherwise exceptionally divergent taxa (*e.g.*,

276 monotypic genera [*Ailurus*, *Eira*] or families [*Dugongidae*, *Orycteropodidae*]), *de novo*  
277 genome assemblies, rather than reference-based assemblies may provide more  
278 information.

279         As a caveat, 10X Genomics methods have not yet been tested for genomes  
280 larger than ~3Gb (e.g., human-sized), so although they are appropriate for many  
281 mammalian species, they may be less applicable to species with larger genomes.  
282 Detailed analysis of structural variation, as is often implicated in ecological adaptation  
283 (Wellenreuther, Mérot, Berdan, & Bernatchez, 2019), remains under the purview of  
284 long-read or hybrid (short and long reads) *de novo* sequencing methods and N50  
285 statistics for linked-read assemblies are still limited relative to true long-read methods.  
286 Although the number of raw reads are variable within both groups — the shotgun-based  
287 and 10X Genomic assemblies — the number of reads is not correlated with genome  
288 quality. This leads us to conclude that differences in assembly quality are not driven by  
289 differences in sequencing depth. Finally, although our results are derived from lower  
290 quality frozen tissue samples, tissues remain unavailable for many pre-molecular era  
291 specimens. While linked-reads may be a solution to produce a *de novo* genome from  
292 poor quality tissues, this method has not been applied to and may not be appropriate for  
293 highly degraded museum study skins or destructively-sampled bone remains. Reduced-  
294 representation genetic approaches (Sanger sequencing, RADseq) or enriched  
295 sequencing methods (Bi et al., 2013; Staats et al., 2013; Jones & Good, 2016) may  
296 remain the most effective means of extracting data from more historic specimens in the  
297 absence of a closely related reference genome.

298           Ultimately, our results underscore the importance of continued scientific  
299   collecting and the archival of personal legacy collections into NHCs into the future, as  
300   new technologies will continue to improve our ability to extract molecular information  
301   from degraded and aged samples. The centralization of biological resources and  
302   associated information ensures the broad utility of these specimens to the scientific  
303   community and facilitates tests, such as these, to determine the best available means of  
304   extracting meaningful sequence data from lower quality DNA. In particular, we endorse  
305   maximizing the utility of a specimen through the archival of multiple tissue types,  
306   through multiple storage media (liquid nitrogen, ethanol, RNA later® [Sigma-Aldrich, St.  
307   Louis, Missouri, USA], etc.) to maximize future uses of these archives as technologies  
308   continue to evolve (Lessa et al., 2014; McLean et al., 2015). The ability to generate  
309   WGS data from field-preserved tissues, further encourages the expansion of resurvey  
310   projects (such as the NSF funded Grinnell Resurvey Project from the Museum of  
311   Vertebrate Zoology, UC Berkeley) as a means for measuring change through time  
312   (Moritz, Patton, Conroy, Parra, White, & Beissinger, 2008) and opens the possibility of  
313   sequencing *de novo* genomes from now extinct species with preserved tissues  
314   available. In an era of unprecedented ecological and environmental change (Ceballos,  
315   Ehrlich, & Dirzo, 2017), genomic analyses of historic samples will help us understand  
316   the evolutionary responses of natural populations to environmental perturbation and  
317   hence lay the foundation for proactive management initiatives and predicting future  
318   responses (Wandeler et al., 2007; Malaney & Cook, 2013).

319

320

321  
322  
323  
324  
325  
326  
327  
328  
329  
330  
331  
332  
333  
334  
335  
336  
337  
338  
339  
340  
341  
342  
343

## ACKNOWLEDGEMENTS

We thank the Museum of Southwestern Biology for the *Peromyscus* tissue loans that made this work possible and the National Institute of Health (Grant Number: NIH R35GM128843) for funding.

## DATA ACCESSIBILITY

All commands used for this work are available at [https://github.com/macmanes-lab/museum\\_genomics](https://github.com/macmanes-lab/museum_genomics). Raw reads and assemblies are available through The European Nucleotide Archive (ENA) under project number PRJEB33530, with assembly IDs: *P. attwateri* (ERZ1029326), *P. nudipes* (ERZ1029275), *P. melanophrys* (ERZ1029325), and *P. aztecus* (ERZ1029324). Assembly statistics are available online at [https://github.com/macmanes-lab/museum\\_genomics/blob/master/assembly\\_stats.md](https://github.com/macmanes-lab/museum_genomics/blob/master/assembly_stats.md). Annotations and predicted transcripts and proteins are available at <http://doi.org/10.5281/zenodo.3351485>.

## AUTHOR CONTRIBUTIONS

All authors contributed equally to this manuscript. MDM assembled the *Peromyscus* genomes.

344

## TABLES & FIGURES

345 Figure 1. Maximum-likelihood phylogeny of examined *Peromyscus* species generated  
346 from consensus orthogroups, demonstrates complete resolution (100 bootstrap support  
347 for all nodes).

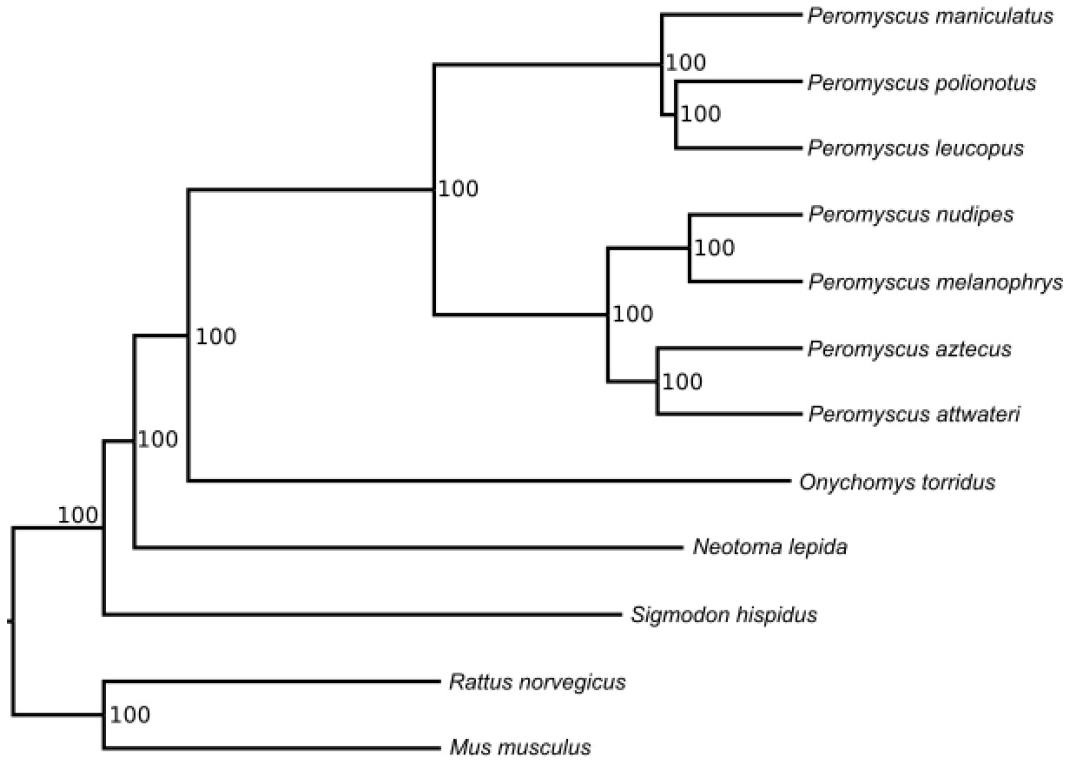

348

349

350



352 **Table 1.** Natural history data for specimens sequenced using 10X Genomics (*Peromyscus* spp.) and publically available  
 353 single-land Illumina assemblies. Coll. = collection. Pub. = publication.

| Common Name              | Genus                | Species            | Coll. Year | Coll. Locality         | Voucher              | Pub.                         |
|--------------------------|----------------------|--------------------|------------|------------------------|----------------------|------------------------------|
| Texas deer mouse         | <i>Peromyscus</i>    | <i>attwateri</i>   | 1995       | Texas, USA             | MSB:Mamm:84733       | This Study                   |
| Aztec deer mouse         | <i>Peromyscus</i>    | <i>aztecus</i>     | 1982       | Michoacan, Mexico      | MSB:Mamm:48205       | This Study                   |
| Plateau deer mouse       | <i>Peromyscus</i>    | <i>melanophrys</i> | 2006       | Coahuila, Mexico       | MSB:Mamm:273915      | This Study                   |
| La carpintera deer mouse | <i>Peromyscus</i>    | <i>nudipes</i>     | 1995       | Guanacaste, Costa Rica | MSB:Mamm:70743       | This Study                   |
| Red vizcacha rat         | <i>Tympanoctomys</i> | <i>barrerae</i>    | na         | Mendoza, Argentina     | AO245                | Evans et al. 2017            |
| Mountain vizcacha rat    | <i>Octomys</i>       | <i>mimax</i>       | na         | San Juan, Argentina    | AO248                | Evans et al. 2017            |
| Siberian hamster         | <i>Phodopus</i>      | <i>sungorus</i>    | na         | Laboratory             | Unvouchered          | Bao et al. 2016, Unpubl.     |
| Three-banded Armadillo   | <i>Tolypeutes</i>    | <i>matacus</i>     | na         | na                     | Voucher not reported | Johnson et al. 2017, Unpubl. |

354

355

356

357

358

359

360

361 **Table 2.** Sequencing and assembly quality statistics for each examined genome, including: Sequencing Platform (Seq.  
 362 Platform), Assembler, Number of Reads (# of Reads [M = million], PE [paired-end], SE [single-end]), Contig N50 in base  
 363 pairs (bp), longest contig (bp), percent (%) complete (C) BUSCOs, and the number of genes (# Genes) annotated.  
 364

| Species               | Seq. Platform     | Assembler       | # Reads (M)     | Contig N50 (bp) | Longest contig (bp) | BUSCO (C:%) | Ortho-groups | # Genes |
|-----------------------|-------------------|-----------------|-----------------|-----------------|---------------------|-------------|--------------|---------|
| <i>P. attwateri</i>   | 10X Genomics      | SuperNova       | 409M PE         | 39,982          | 283,668             | 66.4        | 9,560        | 19,008  |
| <i>P. aztecus</i>     | 10X Genomics      | SuperNova       | 423M PE         | 34,606          | 172,978             | 61.7        | 9,122        | 18,061  |
| <i>P. melanophrys</i> | 10X Genomics      | SuperNova       | 405M PE         | 32,063          | 382,165             | 55.1        | 8,748        | 17,244  |
| <i>P. nudipes</i>     | 10X Genomics      | SuperNova       | 377M PE         | 37,990          | 239,464             | 63.1        | 9,188        | 17,960  |
| <i>T. barrerae</i>    | SL Illumina HiSeq | Abyss           | 342M PE (7M SE) | 5,293           | 74,984              | 23          | 5,305        | 11,177  |
| <i>O. mimax</i>       | SL Illumina HiSeq | Abyss           | 168M PE (3M SE) | 5,223           | 113,044             | 16.9        | 4,154        | 9,631   |
| <i>P. sungorus</i>    | SL Illumina HiSeq | SOAPdenovo      | na              | 2,626           | 34,960              | 12.7        | 2,337        | 3,233   |
| <i>T. matacus</i>     | SL Illumina HiSeq | DISCOVAR denovo | na              | 12,685          | 251,506             | 42.1        | 7,171        | 19,557  |

365 **References**

- 366 Alkan, C., Sajjadian, S., & Eichler, E. E. (2011). Limitations of next-generation genome  
367 sequence assembly. *Nature Methods*, 8, 61–65.
- 368 Andolfatto, P. (2005). Adaptive evolution of non-coding DNA in *Drosophila*. *Nature*, 437,  
369 1149–1152.
- 370 Bao, R., Hazelerigg, D., Prendergast, B., & Stevenson, T. J. (2016). The sequence and  
371 *de novo* assembly of the Siberian hamster genome (*Phodopus sungorus*). Unpublished,  
372 available online: <https://www.ncbi.nlm.nih.gov/nucleotide/1149-1152>.
- 373 Bi, K., Linderoth, T., Vanderpool, D., Good, J. M., Nielsen, R., & Moritz, C. (2013).  
374 Unlocking the vault: next-generation museum population genomics. *Molecular Ecology*,  
375 22(23), 6018–6032.
- 376 Broad Institute. (2015). DISCOVAR: Assemble genomes, find variants.  
377 <https://www.broadinstitute.org/Software/Discover/Blog>.
- 378 Brooks, A., Turkarslan, S., Beer, K., Lo, F., & Baliga, N. (2011). Adaptation of cells to  
379 new environments. *Wiley Interdisciplinary Reviews: Systems Biology and Medicine*,  
380 3(5), 544–561.
- 381 Cantarel, B., Korf, I., Robb, S., Parra, G., Ross, E., Moore, B., ... Yandell, M. (2008).  
382 MAKER: an easy-to-use annotation pipeline designed for emerging model organism  
383 genomes. *Genome Research*, 18(1), 188–196.
- 384 Ceballos, G., Ehrlich, P. R., & Dirzo, R. (2017). Biological annihilation via the ongoing  
385 sixth mass extinction signaled by vertebrate population losses and declines.  
386 *Proceedings of the National Academy of Sciences*, 114(30), E6089–E6096.
- 387 Dean, M. D., & Ballard, W. O. (2001). Factors affecting mitochondrial DNA quality from  
388 museum preserved *Drosophila simulans*. *Entomologia Experimentalis*, 98, 279–283.
- 389 Dessauer, H. C., Cole, C. J., & Hafner, M. S. (1990). Collection and storage of tissues.  
390 In *Molecular Systematics* (D.M. Hillis and C. Moritz (eds), pp. 29–47). Sunderland, MA:  
391 Sinauer Associates.
- 392 Edelman, N., Frandsen, P., Miyagi, M., Clavijo, B., Davey, J., Dikow, R., ... Mallet, J.  
393 (2018). Genomic architecture and introgression shape a butterfly radiation. *BioRxiv*,  
394 466292.
- 395 Emms, D. M., & Kelly, S. (2015). OrthoFinder: solving fundamental biases in whole  
396 genome comparisons dramatically improves orthogroup inference accuracy. *Genome*  
397 *Biology*, 16(1), 157.
- 398 Evans, B., Upham, N., Golding, G., Ojeda, R., & Ojeda, A. (2017). Evolution of the  
399 largest mammalian genome. *Genome Biology and Evolution*, 9(6), 1711–1724.
- 400 Gnerre, S., Lander, E. S., Lindblad-Toh, K., & Jaffe, D. B. (2009). Assisted assembly:  
401 how to improve a *de novo* genome assembly by using related species. *Genome*  
402 *Biology*, 10(8), R88.
- 403 Goodwin, S., McPherson, J. D., & McCombie, W. (2016). Coming of age: ten years of  
404 next-generation sequencing technologies. *Nature Reviews: Genetics*, 17(6), 333.
- 405 Green, R. E., Krause, J., Briggs, A. W., Maricic, T., Stenzel, U., Kircher, M., ... et al.  
406 (2010). A draft sequence of the Neandertal genome. *Science*, 328, 710–722.
- 407 Jackson, B. C., Campos, J. L., & Zeng, K. (2015). The effects of purifying selection on  
408 patterns of genetic differentiation between *Drosophila melanogaster* populations.  
409 *Heredity*, 114(2), 163–174.

- 410 Janzen, G. M., Wang, L., & Hufford, M. B. (2019). The extent of adaptive wild  
411 introgression in crops. *New Phytologist*, 221, 1279–1288.
- 412 Jiao, W.-B., & Schneeberger, K. (2017). The impact of third generation genomic  
413 technologies on plant genome assembly. *Current Opinion in Plant Biology*, 36, 64–70.
- 414 Johnson, J., Muren, E., Swofford, R., Turner-Maier, J., Marinescuc, V. D., Genereux, D.  
415 P., ... Lindblad-Toh, K. (2018). The 200 mammals project: sequencing genomes by a  
416 novel cost-effective method, yielding a high-resolution annotation of the human  
417 genome. Unpublished, available at:  
418 <https://www.ncbi.nlm.nih.gov/nucleotide/PVIB000000000.1/>.
- 419 Jones, M. R., & Good, J. M. (2016). Targeted capture in evolutionary and ecological  
420 genomics. *Molecular Ecology*, 25(1), 185–202.
- 421 Jones, S. J., Haulena, M., Taylor, G. A., Chan, S., Bilobram, S., Warren, R. L., ...  
422 Jones, S. (2017). The genome of the northern sea otter (*Enhydra lutris kenyoni*).  
423 *Genes*, 8(12), E379.
- 424 Jones, S., Taylor, G., Chan, S., Warren, R., Hammond, S., Bilobram, S., ... Haulena, M.  
425 (2017). The genome of the beluga whale (*Delphinapterus leucas*). *Genes*, 8(12), E378.
- 426 Kuleshov, V., Xie, D., Chen, R., Pushkarev, D., Ma, Z., Blauwkamp, T., ... Snyder, M.  
427 (2014). Whole-genome haplotyping using long reads and statistical methods. *Nature*  
428 *Biotechnology*, 32(3), 261.
- 429 Lee, H., Gurtowski, J., Yoo, S., Nattestad, M., Marcus, S., Goodwin, S., ... Schatz, M.  
430 (2016). Third-generation sequencing and the future of genomics. *BioRxiv*, 48603.
- 431 Lessa, E. P., Cook, J. A., D'Elia, G., & Opazo, J. C. (2014). Rodent diversity in South  
432 America: transitioning into the genomics era. *Frontiers in Ecology and Evolution*, 2, 1–7.
- 433 Lindahl, T. (1993). Instability and decay of the primary structure of DNA. *Nature*, 362,  
434 709–715.
- 435 Lynch, M. (1989). Phylogenetic hypotheses under the assumption of neutral  
436 quantitative-genetic variation. *Evolution*, 43(1), 1–17.
- 437 Malaney, J. L., & Cook, J. A. (2013). Using biogeographical history to inform  
438 conservation: the case of Preble's meadow jumping mouse. *Molecular Ecology*, 22(24),  
439 6000–6017.
- 440 McCoy, R., Taylor, R., Blauwkamp, T., Kelley, J., Kertesz, M., Pushkarev, D., ... Fiston-  
441 Lavier, A. (2014). Illumina TruSeq synthetic long-reads empower de novo assembly and  
442 resolve complex, highly-repetitive transposable elements. *PLoS One*, 9, e106689.
- 443 McLean, B. S., Bell, K. C., Dunnum, J. L., Abrahamson, B., Colella, J. P., Deardorff, E.  
444 R., ... Cook, J. A. (2016). Natural history collections-based research: progress, promise,  
445 and best practices. *Journal of Mammalogy*, 97(1), 287–297.
- 446 Meyer, M., Fu, Q., Aximu-Petri, A., Glocke, I., Nickel, B., Arsuaga, J.-L., ... Pääbo, S.  
447 (2014). A mitochondrial genome sequence of a hominin from Sima de los Huesos.  
448 *Nature*, 505(7483), 403.
- 449 Meyer, M., Kircher, M., Gansauge, M., Li, H., Racimo, F., Mallick, S., ... Sudmant, P. H.  
450 (2012). A high-coverage genome sequence from an archaic Denisovan individual.  
451 *Science*, 338(6104), 222–226.
- 452 Moritz, C., Patton, J., Conroy, C., Parra, J., White, G., & Beissinger, S. (2008). Impact of  
453 century of climate change on small-mammal communities in Yosemite National Park.  
454 *USA Science*, 322, 258–261.

- 455 Nachman, M. W. (2013). Genomics and museum specimens. *Molecular Ecology*,  
456 22(24), 5966–5968.
- 457 Nagarajan, N., & Pop, M. (2013). Sequence assembly demystified. *Nature Reviews:*  
458 *Genetics*, 14, 157–167.
- 459 Nei, M., & Tatenno, Y. (1975). Interlocus variation of genetic distance and the neutral  
460 mutation theory. *Proceedings of the National Academy of Sciences*, 72(7), 2758–2760.
- 461 Nguyen, L.-T., Schmidt, H. A., von Haeseler, A., & Minh, B. Q. (2015). IQ-TREE: A fast  
462 and effective stochastic algorithm for estimating maximum likelihood phylogenies.  
463 *Molecular Biology and Evolution*, 32, 268–274.
- 464 Opazo, J. C., Palma, R. E., Melo, F., & Lessa, E. (2005). Adaptive evolution of the  
465 insulin gene in Caviomorph rodents. *Molecular Biology and Evolution*, 22(5), 1290–  
466 1298.
- 467 Payne, R. B., & Sorenson, M. D. (2002). Museum collections as sources of genetic  
468 data. *Bonn Zoological Bulletin*, 51, 97–104.
- 469 Pélissié, B., Crossley, M., Cohen, Z., & Schoville, S. (2018). Rapid evolution in insect  
470 pests: the importance of space and time in population genomics studies. *Current*  
471 *Opinion in Insect Science*, 26, 8–16.
- 472 Pop, M. (2009). Genome assembly reborn: recent computational challenges. *Briefings*  
473 *in Bioinformatics*, 10(4), 354–366.
- 474 Rowe, K. C., Singhal, S., MacManes, M. D., Ayroles, J. F., Morelli, T. L., Rubidge, E.  
475 M., ... Moritz, C. C. (2011). Museum genomics: low-cost and high-accuracy genetic  
476 data from historical specimens. *Molecular Ecology Resources*, 11, 1082–1092.
- 477 Simão, F. A., Waterhouse, R. M., Ioannidis, P., Kriventseva, E. V., & Zdobnov, E. M.  
478 (2015). BUSCO: assessing genome assembly and annotation completeness with  
479 single-copy orthologs. *Bioinformatics*, 31(19), 3210–3212.
- 480 Simpson, J., Wong, K., Jackman, S., Schein, J., Jones, S., & Birol, I. (2009). ABySS: a  
481 parallel assembler for short read sequence data. *Genome Research*, 19(6), 1117–  
482 1123.
- 483 Staats, M., Erkens, R., van de Vossenbergh, B., Wieringa, J., Kraaijeveld, K., Stielow, B.,  
484 ... Bakker, F. (2013). Genomic treasure troves: complete genome sequencing of  
485 herbarium and insect museum specimens. *PLOS ONE*, 8(7), e69189.
- 486 Suarez, A., & Tsutsiu, N. (2004). The value of museum collections for research and  
487 society. *BioScience*, 54(1), 66–74.
- 488 Teeling, E. C., & Hedges, S. B. (2013). Making the impossible possible: rooting the tree  
489 of placental mammals. *Molecular Biology and Evolution*, 30, 1999–2000.
- 490 Tennessen, J. A., Bigham, A. W., O'Connor, T. D., Fu, W., Kenny, E., Gravel, S., ...  
491 Akey, J. (2012). Evolution and functional impact of rare coding variation from deep  
492 sequencing of human exomes. *Science*, 337(6090), 64–69.
- 493 van Dijk, E., Jaszczyszyn, Y., Naquin, D., & Thermes, C. (2018). The third revolution in  
494 sequencing technology. *Trends in Genetics*, 34(9), 666–681.
- 495 Voskoboinik, A., Neff, N. F., Sahoo, D., Newman, A. M., Pushkarev, D., Koh, W., ...  
496 Quake, S. (2013). The genome sequence of the colonial chordate, *Botryllus schlosseri*.  
497 *eLife*, 2, e00569.
- 498 Wandeler, P., Hoeck, P. E., & Keller, L. F. (2007). Back to the future: museum  
499 specimens in population genetics. *Trends in Ecology & Evolution*, 22(12), 634–642.

- 500 Weisenfeld, N. I., Kumar, V., Shah, P., Church, D. M., & Jaffe, D. B. (2017). Direct  
501 determination of diploid genome sequences. *Genome Research*, 27, 757–767.
- 502 Wellenreuther, M., Mérot, C., Berdan, E., & Bernatchez, L. (2019). Going beyond SNPs:  
503 the role of structural genomic variants in adaptive evolution and species diversification.  
504 *Molecular Ecology*, 28(6), 1203–1209.
- 505 Willerslev, E., & Cooper, A. (2005). Ancient DNA. *Proceedings of the Royal Society B:  
506 Biological Sciences*, 272, 3–16.
- 507 Wood, H. M., González, V., Lloyd, M., Coddington, J., & Scharff, N. (2018). Next-  
508 generation museum genomics: Phylogenetic relationships among palpimanoid spiders  
509 using sequence capture techniques (Araneae: Palpimanoidea). *Molecular  
510 Phylogenetics and Evolution*, 127, 907–918.
- 511 Zhang, G.-Q., Liu, K.-W., Li, Z., Lohaus, R., Hsiao, Y.-Y., Niu, S.-C., ... Liu, Z.-J. (2017).  
512 The *Apostasia* genome and the evolution of orchids. *Nature*, 549, 379–383.
- 513 Zheng, G. X. Y., Schnall-Levin, M., Jarosz, M., Bell, J. M., Hindson, C., Kyriazopoulou-  
514 Panagiotopoulou, S., ... Ji, H. (2016). Haplotyping germline and cancer genomes with  
515 high-throughput linked-read sequencing. *Nature Biotechnology*, 34(3), 303–311.
